# Supplementary material for: A Spanish saltasauroid titanosaur reveals Europe as a melting pot of endemic and immigrant sauropods in the Late Cretaceous
Source: PubMed Central journal article supplement — Commun Biol. 2024 Sep 4;7:1016. doi: 10.1038/s42003-024-06653-0 (PMC11375222; doi:10.1038/s42003-024-06653-0), 2024-09-04
Supplement: 42003_2024_6653_MOESM2_ESM.pdf [file 42003_2024_6653_MOESM2_ESM.pdf]

## Description of Additional Supplementary Files

**File name:** Supplementary Data 1

**Description:** Data set (TNT file) for Analysis I and II

**File name:** Supplementary Data 2

**Description:** Data set (TNT file) for Analysis III
